# Supplementary material for: Adaptive integumentary features of beef cattle raised on afforested or non-shaded tropical pastures
Source: Springer Nature journal article supplement (doi:10.1038/s41598-024-66675-w), 2024-07-23
Supplement: MOESM1 [file 41598_2024_66675_MOESM1_ESM.pdf]

## SUPPLEMENTARY MATERIAL

### **Adaptive integumentary features of beef cattle raised on afforested or non-shaded tropical pastures**

Andréa do Nascimento Barreto<sup>1</sup>, Manuel Antonio Chagas Jacintho<sup>2</sup>, Waldomiro Barioni Junior<sup>2</sup>, Alfredo Manuel Franco Pereira<sup>3</sup>, Leonardo Nanni Costa<sup>4</sup>, Felipe Zandonadi Brandão<sup>5</sup>, Narian Romanello<sup>6</sup>, Gabriela Novais Azevedo<sup>2</sup>, Alexandre Rossetto Garcia<sup>1,2,6,\*</sup>

<sup>1</sup>Institute of Veterinary Medicine, Federal University of Pará, Av. dos Universitários, s/n, Castanhal, PA 68746-360, Brazil.

<sup>2</sup>Laboratory of Biotechnology and Animal Reproduction, Brazilian Agricultural Research Corporation, Embrapa Southeast Livestock, Rod. Washington Luiz, km 234, São Carlos, SP 13560-970, Brazil.

<sup>3</sup>Mediterranean Institute for Agriculture, Environment and Development, Institute for Advanced Studies and Research, Universidade de Évora, Pólo da Mitra, Apartado 94, Évora, 7006-554, Portugal.

<sup>4</sup>Department of Agri-Food Science and Technology, University of Bologna, Viale Fanin, 46, Bologna I-40127, Italy.

<sup>5</sup>Fluminense Federal University, Rua Vital Brazil, 64, Niterói, RJ 24230-340, Brazil.

<sup>6</sup>School of Veterinary Medicine and Animal Science, University of São Paulo, Av. Duque de Caxias Norte, 255, Pirassununga, SP 13635-900, Brazil.

#### **\* Corresponding author's information**

Alexandre Rossetto Garcia

alexandre.garcia@embrapa.br

ORCID: 0000-0002-3354-1474

Brazilian Agricultural Research Corporation (Embrapa)

Embrapa Southeast Livestock, São Carlos-SP, Brazil

Phone number: +55 16 34115656

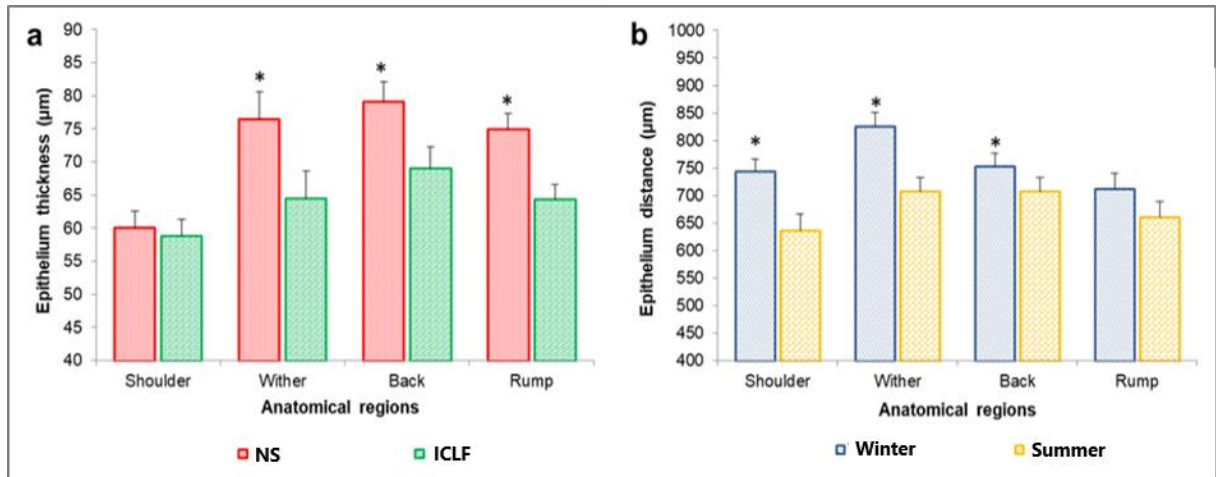

**Supplementary Figure S1** Histomorphometric analysis of different anatomical regions of adult (n=20) Nelore (*Bos indicus*) and Canchim (5/8 *Bos taurus* × 3/8 *Bos indicus*) cattle raised on pasture in non-shaded (NS) or integrated crop-livestock-forest (ICLF) systems, in winter and summer. **(a)** Mean ( $\pm$  standard error) of epithelium thickness by production system; **(b)** mean ( $\pm$  standard error) of epithelium distance by season (The asterisks indicate  $p < 0.05$ ).

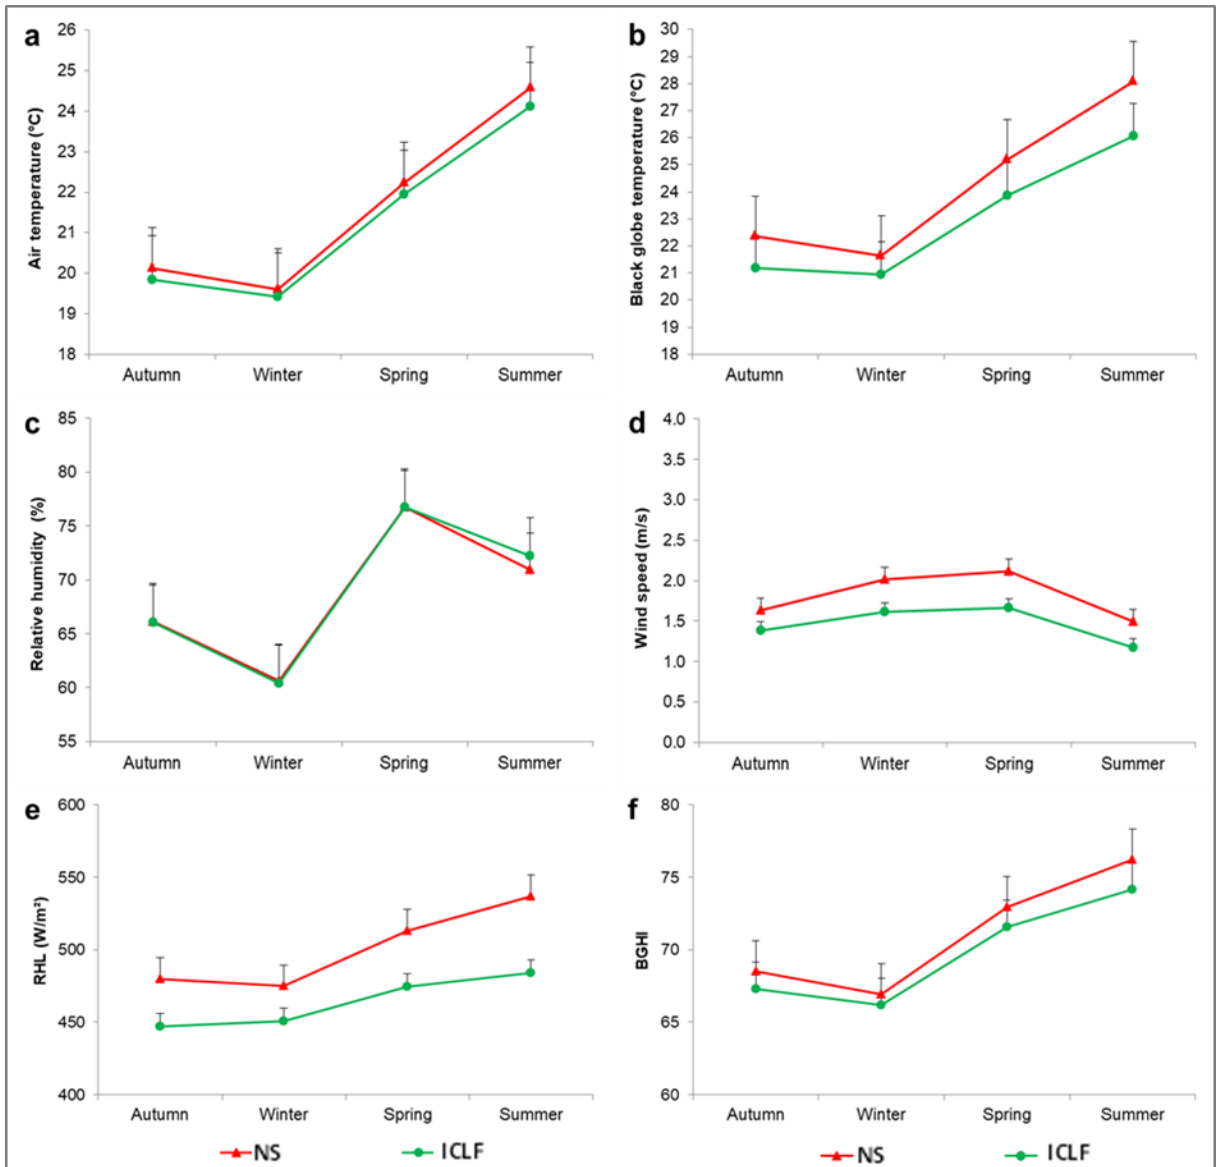

**Supplementary Figure S2** Mean ( $\pm$  standard error) (a) air temperature, (b) black globe temperature, (c) relative humidity, (d) wind speed, (e) black globe temperature and humidity index (BGHI), and (f) radiant heat load (RHL) recorded between 8 a.m. and 4 p.m. under intensive rotational grazing in non-shaded (NS) or integrated crop-livestock-forest (ICLF) systems in a tropical climate.

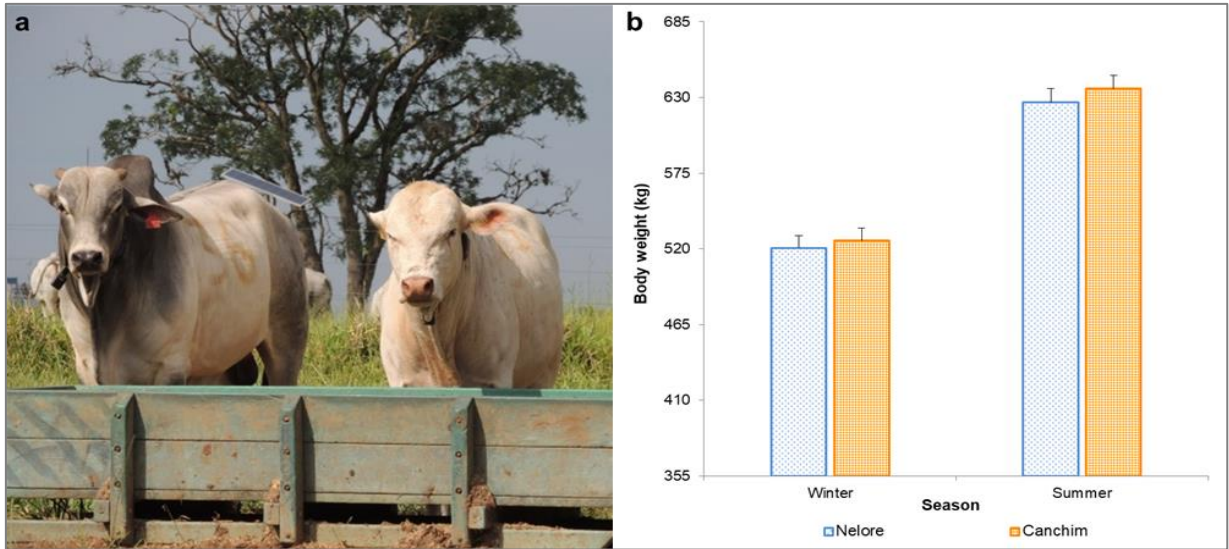

**Supplementary Figure S3** (a) Illustrative photograph of Nelore (*Bos indicus*; left) and Canchim ( $5/8$  *Bos taurus*  $\times$   $3/8$  *Bos indicus*; right) bulls, and (b) average live weight of the study animals (n=64) of both breeds in winter and summer. Bars represent the standard error of the mean.

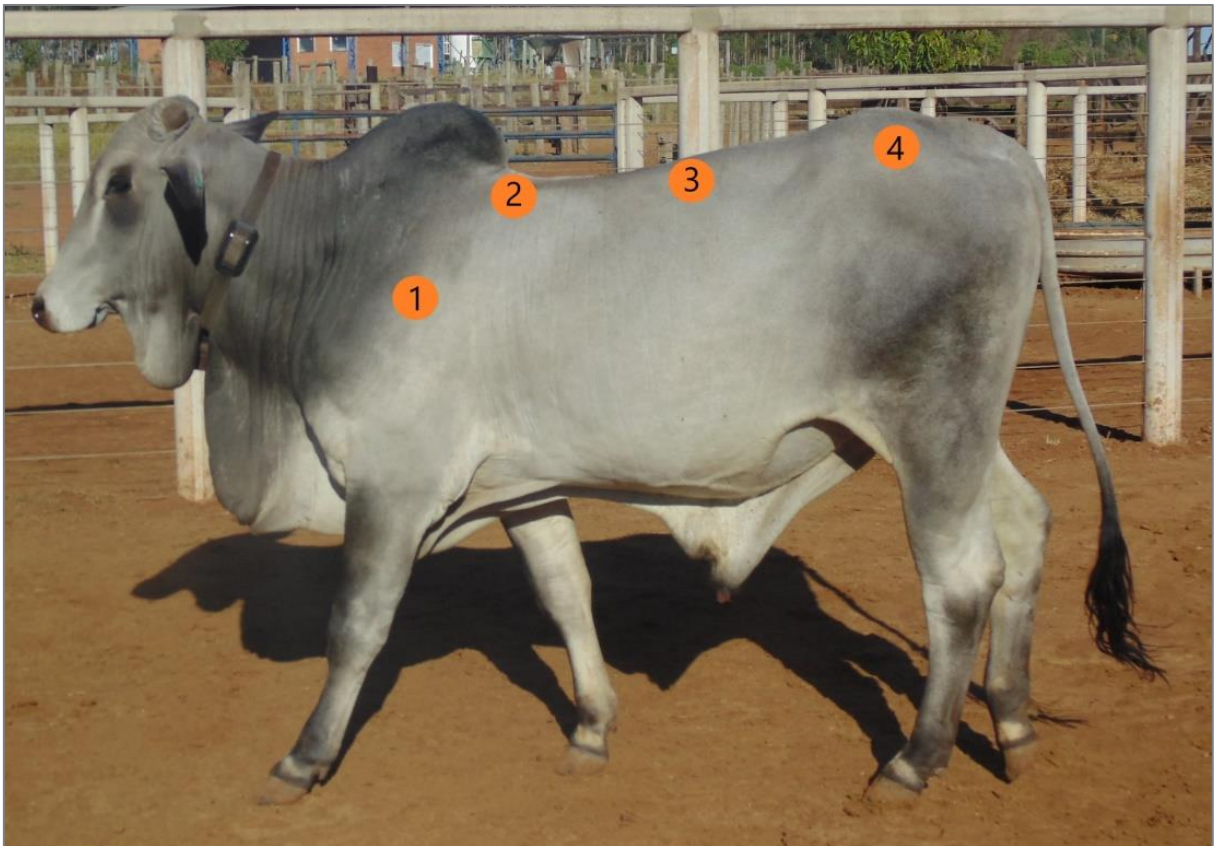

**Supplementary Figure S4** Illustrative photograph of an experimental animal (Nelore cattle), indicating the anatomical regions used for hair collection and skin microbiopsy. The numbers in orange indicate the (1) shoulder, (2) wither, (3) back, and (4) rump regions.

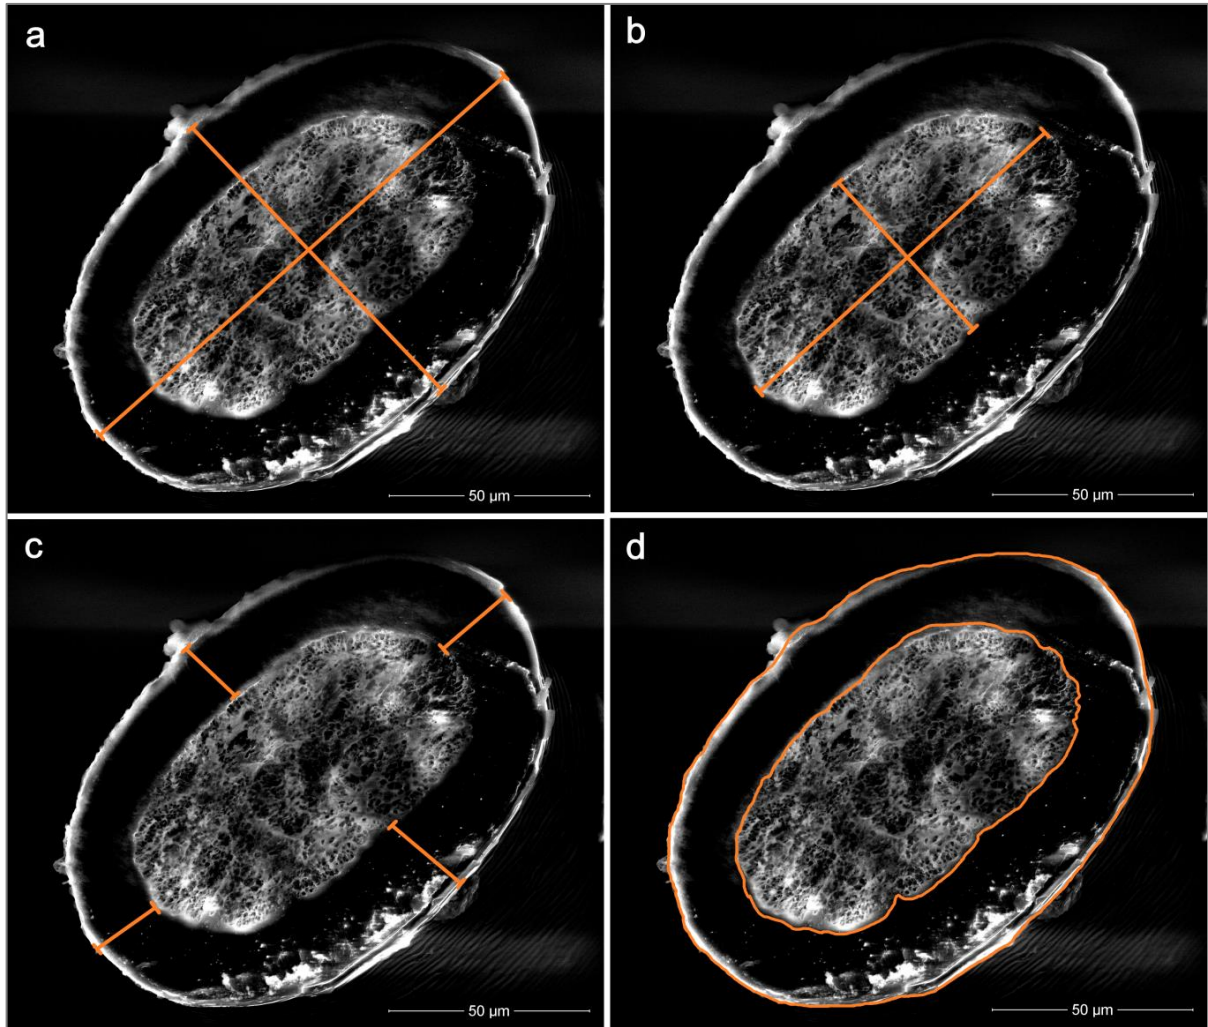

**Supplementary Figure S5** Scanning electron microscopy images of a hair from an experimental bull under 2,000× magnification. The orange marks indicate the morphometric evaluations of the largest and smallest (a) hair and (b) medulla diameters, (c) cortex thickness, and (d) cortex and medulla perimeters.

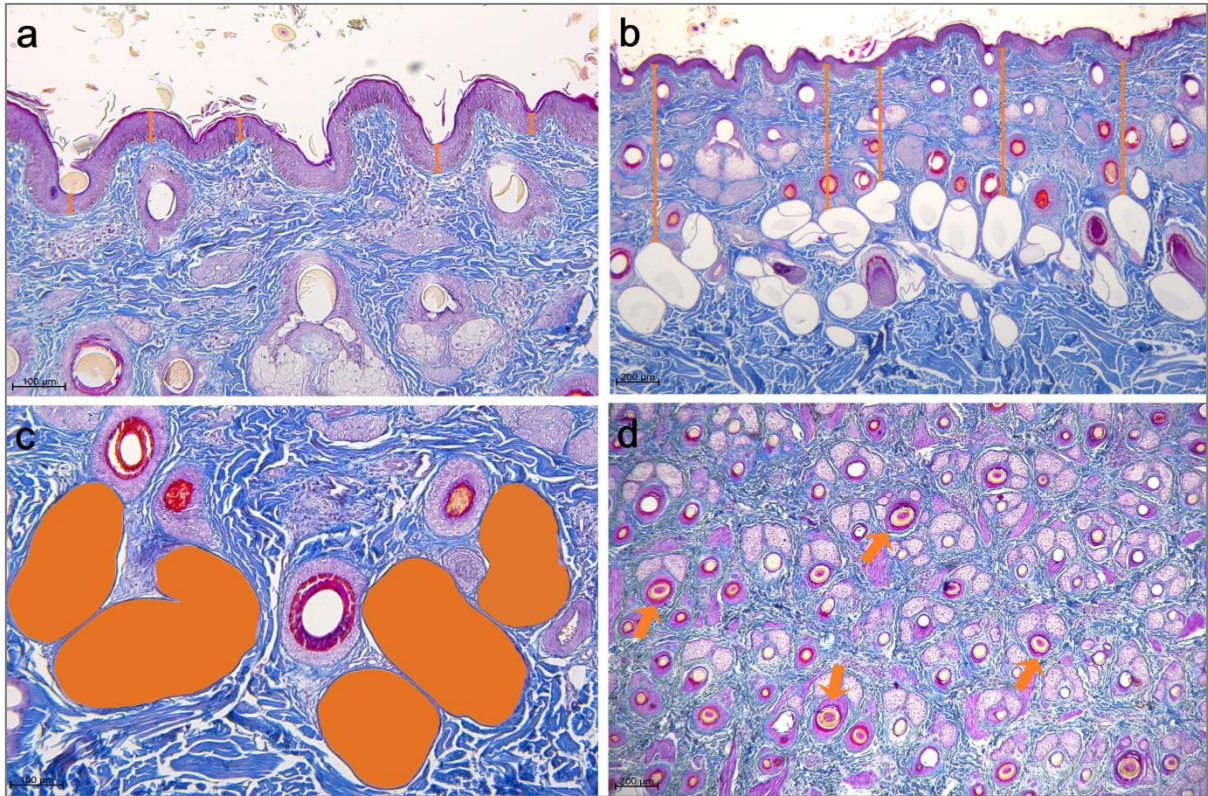

**Supplementary Figure S6** Photomicrographs of skin from an experimental bull showing the histomorphometric analysis of (a) epithelium thickness, (b) epithelial distance to sweat glands, (c) sweat gland area, and (d) number of hair follicles. Orange lines and areas indicate study loci, and orange arrows indicate hair follicles.

**Supplementary Table S1** Histomorphometric variables of the integumentary system of beef cattle evaluated by brightfield microscopy.

| Variable                     | Unit                  | Magnification | Number of images analyzed per animal | Number of measurements per animal |
|------------------------------|-----------------------|---------------|--------------------------------------|-----------------------------------|
| Epithelium thickness         | μm                    | 100×          | 24                                   | 120                               |
| Epithelium distance          | μm                    | 40×           | 24                                   | 120                               |
| Glandular area               | μm <sup>2</sup>       | 100×          | 48                                   | 240 sweat glands                  |
| Proportion of glandular area | %                     | 100×          | 48                                   | 240 sweat glands                  |
| Density of hair follicles    | hairs/mm <sup>2</sup> | 40×           | 72                                   | Ω                                 |

Ω: Count corresponding to the total number of hair follicles observed in each image.
